# Supplementary material for: RHEB/mTOR hyperactivity causes cortical malformations and epileptic seizures through increased axonal connectivity
Source: PLoS Biol. 2021 May 26;19(5):e3001279. doi: 10.1371/journal.pbio.3001279 (PMC8186814; doi:10.1371/journal.pbio.3001279)
Supplement: S3 Data — Excel spreadsheet containining in separate sheets the numerical data underlying Fig 3B, 3C, 3D, and 3F, respectively. (XLSX) [file pbio.3001279.s009.xlsx]

## Sheet: Fig 3B
Migration analysis
RHEBp.P37L-rapamycin	% targeted cells per bin
	Picture 1	Picture 2	Picture 3	Picture 4	Picture 5	Picture 6	Picture 7	Picture 8	Picture 9	Picture 10	Picture 11	Picture 12	Picture 13	Picture 14	Picture 15	Picture 16	Picture 17	Picture 18	Picture 19	Picture 20	Picture 21	MEAN	SEM
Bin1 (L1)	18.1818	0	0	0	1.16279	4.87805	0	0	0	0	0	0	0	0	0	0	0	1.96078	1.81818	3.33333	0	1.49214	0.882679
Bin2	18.1818	12.5	0	6.66667	7.55814	21.9512	11.7647	0	2.94118	12.1951	4	2	3.22581	0	0	0	4.16667	1.96078	0	0	9.52381	5.64933	1.41264
Bin3	39.3939	50	52.9412	60	45.9302	48.7805	29.4118	0	20.5882	17.0732	0	12	3.22581	0	0	0	20.8333	0	5.45455	0	14.2857	19.9961	4.61615
Bin4	21.2121	31.25	35.2941	20	19.7674	17.0732	35.2941	28.2051	58.8235	21.9512	28	24	32.2581	4	5.26316	16.6667	37.5	7.84314	10.9091	16.6667	57.1429	25.1962	3.18396
Bin5	3.0303	6.25	0	6.66667	5.81395	2.43902	23.5294	56.4103	17.6471	14.6341	44	24	35.4839	48	21.0526	33.3333	16.6667	37.2549	29.0909	60	9.52381	23.5632	3.95396
Bin6	0	0	0	6.66667	8.72093	0	0	12.8205	0	12.1951	20	16	22.5806	32	26.3158	50	20.8333	39.2157	38.1818	16.6667	0	15.3427	3.30229
Bin7	0	0	0	0	1.74419	2.43902	0	0	0	7.31707	4	12	0	4	10.5263	0	0	5.88235	7.27273	3.33333	4.7619	3.01319	0.816424
Bin8	0	0	0	0	3.48837	0	0	2.5641	0	9.7561	0	8	3.22581	12	36.8421	0	0	3.92157	3.63636	0	4.7619	4.19983	1.80643
Bin9	0	0	0	0	4.65116	2.43902	0	0	0	4.87805	0	2	0	0	0	0	0	0	1.81818	0	0	0.751734	0.333867
Bin10 (IZ)	0	0	11.7647	0	1.16279	0	0	0	0	0	0	0	0	0	0	0	0	1.96078	1.81818	0	0	0.795546	0.564042
	% targeted cells L2/3																					represented on graph
RHEBp.P37L-rapamycin	Picture 1	Picture 2	Picture 3	Picture 4	Picture 5	Picture 6	Picture 7	Picture 8	Picture 9	Picture 10	Picture 11	Picture 12	Picture 13	Picture 14	Picture 15	Picture 16	Picture 17	Picture 18	Picture 19	Picture 20	Picture 21	MEAN	SEM
Sum Bin1 to Bin5	100	100	88.2353	93.3333	80.2326	95.122	100	84.6154	100	65.8537	76	62	74.1935	52	26.3158	50	79.1667	49.0196	47.2727	80	90.4762	75.897	4.63507
																						For the averaged values of EV and P37L see S1_Data, Fig. 1C

## Sheet: Fig 3C
Number of seizures per day (RHEBp.P37L-rapamycin)
	5 weeks			6 weeks			7 weeks			9 weeks			presented on graph
	Day 1	Day 2	Day 3	Day 1	Day 2	Day 3	Day 1	Day 2	Day 3	Day 1	Day 2	Day 3	Averaged number of seizures per mouse/day
Mouse 1	ND	ND	1	0	1	2	0	0	-	-	-	-	0.666667
Mouse 2	2	0	1	1	3	1	1	2	0	0	7	3	1.75
Mouse 3	2	1	0	2	1	0	1	3	1	0	2	1	1.16667
Mouse 4	ND	ND	1	3	0	8	7	5	5	3	-	-	4
Mouse 5	ND	ND	2	3	0	0	1	0	4	-	-	-	1.42857
Mouse 6	ND	ND	ND	ND	ND	ND	2	1	5	-	-	-	2.66667
ND = not detected, before seizures onset												Mean	1.94643
- = no recording												SEM	0.492899
													For the data related to the RHEBp.P37L group see S2_Data

## Sheet: Fig 3D
Migration analysis split between seizures/no seizures
RHEBp.P37L-rapamycin	% targeted cells per bin
	Mouse 1		Mouse 2			Mouse 3		Mouse 4
no seizure group	Picture 1	Picture 2	Picture 3	Picture 4	Picture 5	Picture 6	Picture 7	Picture 8	Picture 9	MEAN	SEM
Bin1 (L1)	18.1818	0	0	0	0	1.16279	4.87805	0	0	2.69141	2.00878
Bin2	18.1818	11.7647	12.5	0	6.66667	7.55814	21.9512	0	2.94118	9.06264	2.57696
Bin3	39.3939	29.4118	50	52.9412	60	45.9302	48.7805	0	20.5882	38.5606	6.29196
Bin4	21.2121	35.2941	31.25	35.2941	20	19.7674	17.0732	28.2051	58.8235	29.6577	4.31344
Bin5	3.0303	23.5294	6.25	0	6.66667	5.81395	2.43902	56.4103	17.6471	13.5319	5.92969
Bin6	0	0	0	0	6.66667	8.72093	0	12.8205	0	3.13423	1.65182
Bin7	0	0	0	0	0	1.74419	2.43902	0	0	0.464801	0.312842
Bin8	0	0	0	0	0	3.48837	0	2.5641	0	0.672497	0.451434
Bin9	0	0	0	0	0	4.65116	2.43902	0	0	0.787799	0.552727
Bin10 (IZ)	0	0	0	11.7647	0	1.16279	0	0	0	1.43639	1.29739
% targeted cells L2/3 in RHEBp.P37L-rapamycin
RHEBp.P37L-rapamycin no seizure group	% targeted cells L2/3
	Mouse 1		Mouse 2			Mouse 3		Mouse 4
	Picture 1	Picture 2	Picture 3	Picture 4	Picture 5	Picture 6	Picture 7	Picture 8	Picture 9
Sum Bin1 to Bin5 per picture	100	100	100	88.2353	93.3333	80.2326	95.122	84.6154	100	MEAN	SEM
Average per mouse represented on graph	100		93.8562			87.6773		92.3077		93.4603	2.54455
RHEBp.P37L-rapamycin	% targeted cells per bin
	Mouse 1			Mouse 2			Mouse 3		Mouse 4		Mouse 5
seizure group	Picture 1	Picture 2	Picture 3	Picture 4	Picture 5	Picture 6	Picture 7	Picture 8	Picture 9	Picture 10	Picture 11	Picture 12	Average	SEM
Bin1 (L1)	0	0	0	0	0	0	0	0	1.96078	1.81818	3.33333	0	0.592692	0.326206
Bin2	12.1951	4	2	3.22581	0	0	0	4.16667	1.96078	0	0	9.52381	3.08935	1.15636
Bin3	17.0732	0	12	3.22581	0	0	0	20.8333	0	5.45455	0	14.2857	6.07271	2.255
Bin4	21.9512	28	24	32.2581	4	5.26316	16.6667	37.5	7.84314	10.9091	16.6667	57.1429	21.8501	4.44211
Bin5	14.6341	44	24	35.4839	48	21.0526	33.3333	16.6667	37.2549	29.0909	60	9.52381	31.0867	4.30793
Bin6	12.1951	20	16	22.5806	32	26.3158	50	20.8333	39.2157	38.1818	16.6667	0	24.4991	3.92755
Bin7	7.31707	4	12	0	4	10.5263	0	0	5.88235	7.27273	3.33333	4.7619	4.92448	1.13691
Bin8	9.7561	0	8	3.22581	12	36.8421	0	0	3.92157	3.63636	0	4.7619	6.84532	2.96431
Bin9	4.87805	0	2	0	0	0	0	0	0	1.81818	0	0	0.724686	0.433442
Bin10 (IZ)	0	0	0	0	0	0	0	0	1.96078	1.81818	0	0	0.314914	0.212496
% targeted cells L2/3 in RHEBp.P37L-rapamycin
RHEBp.P37L-rapamycin seizure group	% targeted cells L2/3
	Mouse 1			Mouse 2			Mouse 3		Mouse 4		Mouse 5
	Picture 1	Picture 2	Picture 3	Picture 4	Picture 5	Picture 6	Picture 7	Picture 8	Picture 9	Picture 10	Picture 11	Picture 12
Sum Bin1 to Bin5 per picture	65.8537	76	62	74.1935	52	26.3158	50	79.1667	49.0196	47.2727	80	90.4762	MEAN	SEM
Average per mouse represented on graph	67.9512			50.8364			64.5833		48.1462		85.2381		63.3511	6.66906

## Sheet: Fig 3F
Average number of siezures post-rapamycin
Number of seizure per day per mouse	Baseline			rapamycin			14days			4weeks
	day1	day2	day3	day1	day2	day3	day1	day2	day3	day1	day2	day3
Mouse 1	3	4	4	1	1	3	0	0	0	0	0	0
Mouse 2	4	4	5	2	1	3	0	0	0	0	1	0
Mouse 3	0	1	5	1	1	0	0	0	0	4	5	3
Mouse 4	0	10	6	0	3	6	0	0	0	2	4	-
Mouse 5	0	12	11	0	0	4	0	0	0	4	9	-
Mouse 6	0	8	13	0	1	1	0	0	0	0	0	-
- = no recording
Averaged number of seizure per day represented on graph	Baseline	rapamycin	14days	4weeks
Mouse 1	3.66667	1.66667	0	0
Mouse 2	4.33333	2	0	0.333333
Mouse 3	2	0.666667	0	4
Mouse 4	5.33333	3	0	3
Mouse 5	7.66667	1.33333	0	6.5
Mouse 6	7	0.666667	0	0
MEAN	5	1.55556	0	2.30556
SEM	0.864956	0.361752	0	1.08731

## Sheet: Legend S3_Data
Fig 3B
Includes migration analysis data of the targeted cells across the layers of the SScx (as % of the total number of targeted cells) divided in equal bins (10) for every picture analyzed for RHEBp.P37L mice prenatally treated with rapamycin
targeted cells reaching L2/3 are calculated by summing the % of cells located between bin 1 and 5 for each picture and averaged to plot the data in the graph
Fig 3C
Includes observed number of seizures per day for every recording sessions (at 5, 6, 7 and 9 weeks) and total average number represented in the graph
Fig 3D
Includes the data shown in Fig. 3B divided in two groups: migration analysis for mice with and without seizures
Fig 3F
Includes number of seizures observed per mouse per day of recording before (baseline), during and after rapamycin (14 days and 4 weeks); data are shown in the graph as average per day
